# Supplementary material for: Adenosine Kinase of T. b. rhodesiense Identified as the Putative Target of 4-[5-(4-phenoxyphenyl)-2H-pyrazol-3-yl]morpholine Using Chemical Proteomics
Source: PubMed Central journal article supplement (PMC2724708; doi:10.1371/journal.pntd.0000506), 2009-08-25
Supplement: pntd.0000506.s001.pdf [file pntd.0000506.s001.pdf]

## Supporting Information Figure S1

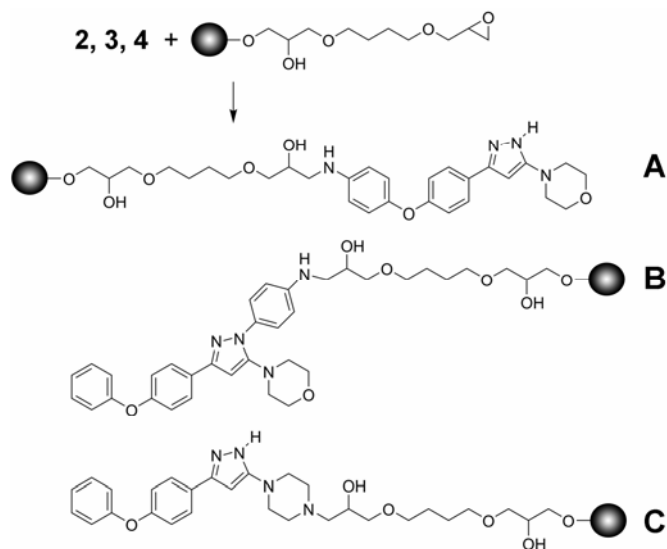

**Figure S1. Affinity matrix preparation.** 4-[4-(5-morpholine-4-yl-1H-pyrazol-3-yl)-phenoxy]-phenylamine (**2**), 4-[5-morpholine-4-yl-3-(4-phenoxyphenyl)-pyrazol-1-yl]phenylamine (**3**) and 1-[5-(4-phenoxy-phenyl)-2H-pyrazol-3-yl]piperazine (**4**) were coupled to epoxy-activated agarose consisting of a 12-atoms spacer (1,4-bis(2:3-epoxypropoxy)butane) to form affinity matrices **A**, **B**, and **C**, respectively. The agarose beads are shown as spheres.
