# Supplementary material for: Adenosine Kinase of T. b. rhodesiense Identified as the Putative Target of 4-[5-(4-phenoxyphenyl)-2H-pyrazol-3-yl]morpholine Using Chemical Proteomics
Source: PubMed Central journal article supplement (PMC2724708; doi:10.1371/journal.pntd.0000506), 2009-08-25
Supplement: pntd.0000506.s002.pdf [file pntd.0000506.s002.pdf]

## Supporting Information Figure S2

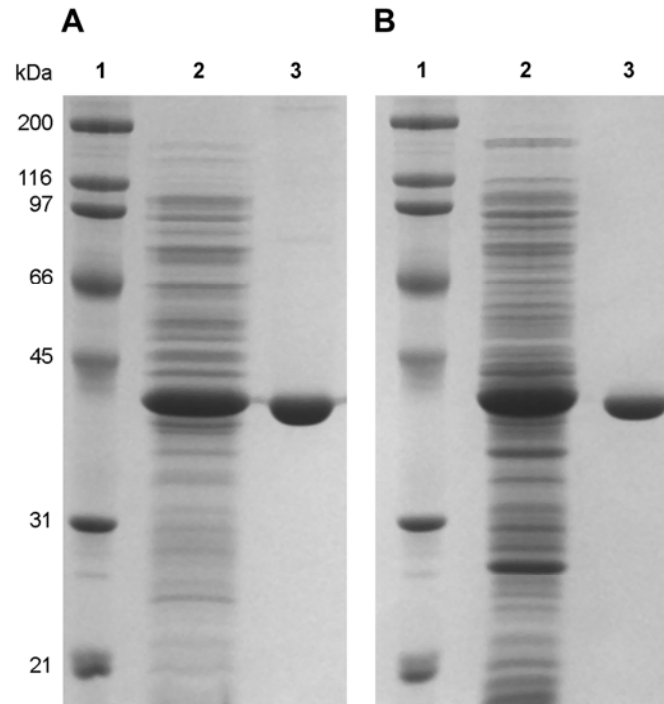

**Figure S2. SDS-PAGE analysis of expression and purification of recombinant proteins.** Panel A: TbrGAPDH, panel B: TbrAK. Lane 1: marker proteins; lane 2: soluble fraction of crude extract; lane 3: final pure protein. The expected molecular weights for TbrGAPDH (including His<sub>6</sub>-tag) and TbrAK are 41.2 kDa and 38.0 kDa, respectively. Molecular mass of the markers are shown on the left.
