# Supplementary material for: Adenosine Kinase of T. b. rhodesiense Identified as the Putative Target of 4-[5-(4-phenoxyphenyl)-2H-pyrazol-3-yl]morpholine Using Chemical Proteomics
Source: PubMed Central journal article supplement (PMC2724708; doi:10.1371/journal.pntd.0000506), 2009-08-25
Supplement: pntd.0000506.s003.pdf [file pntd.0000506.s003.pdf]

### Supporting Information Figure S3

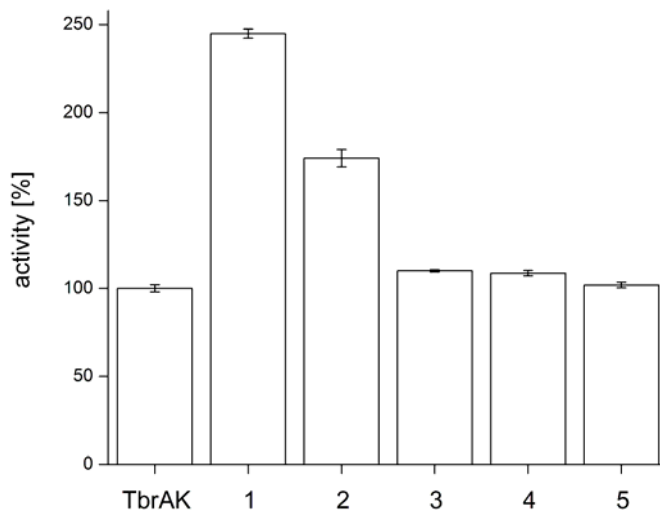

**Figure S3. Activation properties of compounds 1 to 5 measured by HPLC and monitoring ADP formation and ATP consumption.** TbrAK (0.7  $\mu$ M) was incubated for 10 min at 37°C in absence or presence of 50  $\mu$ M compound. Compound **1** and **2** lead to strong TbrAK activation with compound **1** showing up to a 2.5 fold increase. The corresponding values are: 100  $\pm$  2 % without compound (TbrAK), 245  $\pm$  3 % (compound **1**), 174  $\pm$  5% (compound **2**), 110  $\pm$  1 % (compound **3**), 109  $\pm$  1 % (compound **4**), and 102  $\pm$  2 % for the negative control (compound **5**). Values are reported as % activity derived from ADP/ATP ratios. For comparative reasons the activity recorded in absence of compound (column labeled TbrAK) was set to 100 %. The mean of three independent experiments is reported.
