# Supplementary material for: Adenosine Kinase of T. b. rhodesiense Identified as the Putative Target of 4-[5-(4-phenoxyphenyl)-2H-pyrazol-3-yl]morpholine Using Chemical Proteomics
Source: PubMed Central journal article supplement (PMC2724708; doi:10.1371/journal.pntd.0000506), 2009-08-25
Supplement: pntd.0000506.s004.pdf [file pntd.0000506.s004.pdf]

## Supporting Information Figure S4

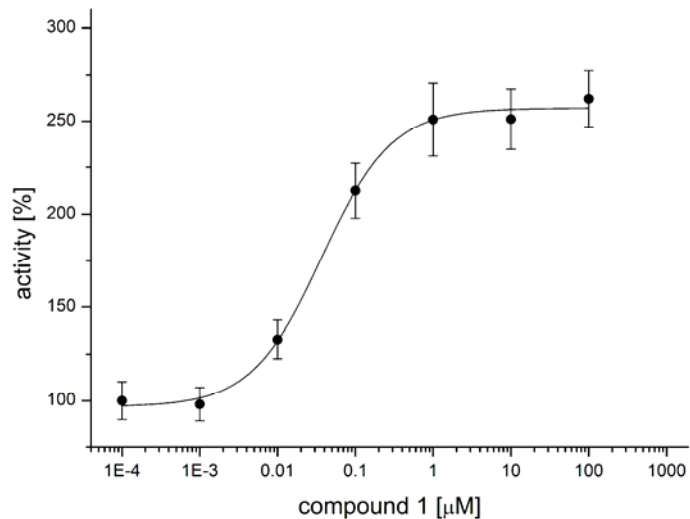

**Figure S4. Concentration dependence of the activation effect of compound 1 analyzed by a radiometric assay.** Increasing concentrations of compound 1 yield a sigmoid saturation curve for TbrAK activation with an  $EC_{50}$  value of  $38 \pm 12$  nM. Values are reported as % activity derived from the transformation rate. For comparative reasons the activity recorded in absence of compound was set to 100 %. The mean of four independent measurements is reported.
