# Supplementary material for: Adenosine Kinase of T. b. rhodesiense Identified as the Putative Target of 4-[5-(4-phenoxyphenyl)-2H-pyrazol-3-yl]morpholine Using Chemical Proteomics
Source: PubMed Central journal article supplement (PMC2724708; doi:10.1371/journal.pntd.0000506), 2009-08-25
Supplement: pntd.0000506.s006.pdf [file pntd.0000506.s006.pdf]

## Supporting Information Table S1

**Table S1.** Thermal stability assay regarding TbrGAPDH in absence and presence of compounds and substrates.

|                              | $T_m$ [°C] <sup>a</sup> | $\Delta T_m$ [°C] |
|------------------------------|-------------------------|-------------------|
| TbrGAPDH                     | $47.6 \pm 0.3$          | –                 |
| TbrGAPDH + compound <b>1</b> | $46.8 \pm 0.1$          | - 0.8             |
| TbrGAPDH + compound <b>2</b> | $47.0 \pm 0.4$          | - 0.6             |
| TbrGAPDH + compound <b>3</b> | $45.5 \pm 0.6$          | - 2.1             |
| TbrGAPDH + compound <b>4</b> | $47.0 \pm 0.1$          | - 0.6             |
| TbrGAPDH + compound <b>5</b> | $46.7 \pm 0.2$          | - 0.9             |
| TbrGAPDH + NAD <sup>+</sup>  | $55.6 \pm 0.2$          | 8.0               |
| TbrGAPDH + DL-GAP            | $50.0 \pm 0.7$          | 2.4               |

<sup>a</sup>Values represent the average of at least two experiments.
